# Supplementary material for: Experimental characterization and first principles calculations of linear and nonlinear optical properties of two orthophosphates A3Al2(PO4)3(A = Rb, K)
Source: Royal Society of Chemistry journal article supplement (doi:10.1039/c8qi01249k), 2018-12-20
Supplement: c8qi01249k1.pdf [file c8qi01249k1.pdf]

Supporting Information

**Experimental characterization and first principle calculation on  
linear and nonlinear optical properties of two orthophosphates**

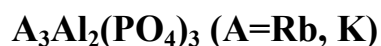

*Ming Wen,<sup>a</sup> Hongping Wu,<sup>b</sup> Shichao Cheng,<sup>c</sup> Jun Sun,<sup>b</sup> Zhihua Yang,<sup>b</sup> Xiaohong Wu,*

*a,\* and Shilie Pan<sup>ab,\*</sup>*

<sup>a</sup> School of Chemistry and Chemical Engineering, Harbin Institute of Technology,  
Harbin Heilongjiang 150001, China.

<sup>b</sup> CAS Key Laboratory of Functional Materials and Devices for Special Environments,  
Xinjiang Technical Institute of Physics & Chemistry; CAS; Xinjiang Key Laboratory  
of Electronic Information Materials and Devices, 40-1 South Beijing Road, Urumqi  
830011, China.

<sup>c</sup> School of Physical Science and Technology, Xinjiang University, 666 Shengli Road,  
Urumqi 830046, China.

wuxiaohong@hit.edu.cn, slpan@ms.xjb.ac.cn

**Table S1.** Crystal data and structure refinements for Rb<sub>3</sub>Al<sub>2</sub>(PO<sub>4</sub>)<sub>3</sub> and K<sub>3</sub>Al<sub>2</sub>(PO<sub>4</sub>)<sub>3</sub>.

| Empirical formula                                             | Rb <sub>3</sub> Al <sub>2</sub> (PO <sub>4</sub> ) <sub>3</sub> | K <sub>3</sub> Al <sub>2</sub> (PO <sub>4</sub> ) <sub>3</sub> |
|---------------------------------------------------------------|-----------------------------------------------------------------|----------------------------------------------------------------|
| Temperature                                                   | 296(2) K                                                        |                                                                |
| Wavelength                                                    | 0.71073 Å                                                       |                                                                |
| Crystal system                                                | Orthorhombic                                                    |                                                                |
| Space group                                                   | <i>Cmc</i> 2 <sub>1</sub>                                       | <i>Pna</i> 2 <sub>1</sub>                                      |
| Formula weight                                                | 595.28                                                          | 456.17                                                         |
| <i>a</i> (Å)                                                  | 17.145(6)                                                       | 8.671(3)                                                       |
| <i>b</i> (Å)                                                  | 8.622(2)                                                        | 16.906(5)                                                      |
| <i>c</i> (Å)                                                  | 8.796(3)                                                        | 8.445(2)                                                       |
| Z, Volume (Å <sup>3</sup> )                                   | 4, 1300.3(7)                                                    | 4, 1238.0(6)                                                   |
| $\rho_{\text{Calcd}}$ (Mg/m <sup>3</sup> )                    | 3.041                                                           | 2.447                                                          |
| $\mu$ (mm)                                                    | 11.806                                                          | 1.689                                                          |
| F(000)                                                        | 1112                                                            | 896                                                            |
| R(int)                                                        | 0.1303                                                          | 0.0523                                                         |
| Goodness-of-fit on F <sup>2</sup>                             | 0.943                                                           | 1.081                                                          |
| Final R indices [ $F_o^2 > 2\sigma(F_o^2)$ ] <sup>a</sup>     | R1 = 0.0497,<br>wR2=0.0776                                      | R1 =0.0387,<br>wR2=0.0691                                      |
| R indices (all data) <sup>a</sup>                             | R1 = 0.0725,<br>wR2=0.0878                                      | R1= 0.0489,<br>wR2=0.0766                                      |
| Absolute structure parameter                                  | 0.017(17)                                                       | 0.31(8)                                                        |
| Largest diff. peak and hole (e <sup>-</sup> Å <sup>-3</sup> ) | 1.675 and 1.482                                                 | 0.513 and 0.524                                                |

$$^a R_1 = \frac{\sum ||F_o| - |F_c||}{\sum |F_o|} \text{ and } wR_2 = \left[ \frac{\sum w(F_o^2 - F_c^2)^2}{\sum w F_o^4} \right]^{1/2} \text{ for } F_o^2 > 2\sigma(F_o^2)$$

**Table S2a.** Atomic coordinates ( $\times 10^4$ ) and equivalent isotropic displacement parameters ( $\text{\AA}^2 \times 10^3$ ) for  $\text{Rb}_3\text{Al}_2(\text{PO}_4)_3$ .  $U_{\text{eq}}$  is defined as one-third of the trace of the orthogonalized  $U_{ij}$  tensor.

| Atom  | x       | y        | z        | U(eq) |
|-------|---------|----------|----------|-------|
| Rb(1) | 3848(1) | 10462(1) | 7384(2)  | 23(1) |
| Rb(2) | 5000    | 3551(2)  | 4468(3)  | 46(1) |
| P(1)  | 5000    | 7655(5)  | 5174(4)  | 15(1) |
| P(2)  | 7052(2) | 3295(3)  | 4245(3)  | 13(1) |
| Al(1) | 6674(2) | 6528(4)  | 5840(3)  | 14(1) |
| O(1)  | 7897(4) | 3037(8)  | 4841(9)  | 22(2) |
| O(2)  | 5000    | 9392(11) | 5219(13) | 23(2) |
| O(3)  | 6727(4) | 4775(10) | 4936(13) | 36(2) |
| O(4)  | 7158(4) | 3631(9)  | 2538(10) | 34(2) |
| O(5)  | 5000    | 6988(14) | 3616(13) | 34(3) |
| O(6)  | 6523(4) | 1964(9)  | 4534(9)  | 29(2) |
| O(7)  | 5713(4) | 7034(9)  | 6122(8)  | 24(2) |

**Table S2b.** Atomic coordinates ( $\times 10^4$ ) and equivalent isotropic displacement parameters ( $\text{\AA}^2 \times 10^3$ ) for  $\text{K}_3\text{Al}_2(\text{PO}_4)_3$ .  $U_{\text{eq}}$  is defined as one-third of the trace of the orthogonalized  $U_{ij}$  tensor.

| Atom  | x       | y       | z       | U(eq) |
|-------|---------|---------|---------|-------|
| K(1)  | -437(2) | 6423(1) | 92(2)   | 24(1) |
| K(2)  | 131(2)  | 6013(1) | 4858(2) | 24(1) |
| K(3)  | 3252(2) | 4910(1) | 7097(2) | 36(1) |
| P(1)  | 6599(2) | 7134(1) | 3184(2) | 13(1) |
| P(2)  | 2966(2) | 6884(1) | 8111(2) | 14(1) |
| P(3)  | 2394(2) | 4971(1) | 2395(3) | 17(1) |
| Al(1) | 3514(2) | 6604(1) | 1758(2) | 13(1) |
| Al(2) | 6309(2) | 6688(1) | 6663(2) | 14(1) |
| O(1)  | 5823(5) | 7068(3) | 4817(6) | 17(1) |
| O(2)  | 5307(5) | 7044(3) | 1937(6) | 18(1) |
| O(3)  | 7161(5) | 8001(3) | 3064(6) | 18(1) |
| O(4)  | 3703(5) | 5599(3) | 2081(6) | 24(1) |
| O(5)  | 7860(5) | 6550(3) | 2912(6) | 21(1) |
| O(6)  | 2835(5) | 6904(3) | 9915(6) | 25(1) |
| O(7)  | 898(5)  | 5275(3) | 1754(7) | 28(1) |
| O(8)  | 2929(6) | 4246(3) | 1400(6) | 25(1) |
| O(9)  | 2369(6) | 4764(3) | 4119(7) | 30(1) |
| O(10) | 1815(6) | 6340(3) | 7423(7) | 34(1) |
| O(11) | 4633(5) | 6644(3) | 7749(6) | 34(2) |
| O(12) | 2749(5) | 7740(3) | 7548(7) | 27(1) |

**Table S3a.** Selected bond distances (Å) and angles (deg) for Rb<sub>3</sub>Al<sub>2</sub>(PO<sub>4</sub>)<sub>3</sub>.

|                     |           |                     |            |
|---------------------|-----------|---------------------|------------|
| Rb(1)-O(2)          | 2.894(9)  | O(1)#3-Rb(1)-O(1)#6 | 117.9(2)   |
| Rb(1)-O(6)#1        | 2.891(8)  | O(4)#3-Rb(1)-O(1)#6 | 74.5(2)    |
| Rb(1)-O(6)#2        | 2.892(8)  | O(5)#4-Rb(1)-O(1)#6 | 159.7(2)   |
| Rb(1)-O(1)#3        | 3.002(7)  | O(2)#4-Rb(1)-O(1)#6 | 145.1(2)   |
| Rb(1)-O(4)#3        | 3.004(8)  | O(7)#5-Rb(1)-O(1)#6 | 48.68(18)  |
| Rb(1)-O(5)#4        | 3.148(10) | O(6)#5-Rb(2)-O(6)   | 124.7(3)   |
| Rb(1)-O(2)#4        | 3.184(9)  | O(6)#5-Rb(2)-O(5)   | 117.04(15) |
| Rb(1)-O(7)#5        | 3.245(7)  | O(6)-Rb(2)-O(5)     | 117.04(15) |
| Rb(1)-O(1)#6        | 3.469(7)  | O(6)#5-Rb(2)-O(3)   | 168.3(2)   |
| Rb(2)-O(6)#5        | 2.949(8)  | O(6)-Rb(2)-O(3)     | 47.5(2)    |
| Rb(2)-O(6)          | 2.949(8)  | O(5)-Rb(2)-O(3)     | 73.10(18)  |
| Rb(2)-O(5)          | 3.057(12) | O(6)#5-Rb(2)-O(3)#5 | 47.5(2)    |
| Rb(2)-O(3)          | 3.170(8)  | O(6)-Rb(2)-O(3)#5   | 168.3(2)   |
| Rb(2)-O(3)#5        | 3.170(8)  | O(5)-Rb(2)-O(3)#5   | 73.10(18)  |
| Rb(2)-O(7)#7        | 3.227(8)  | O(3)-Rb(2)-O(3)#5   | 138.2(3)   |
| Rb(2)-O(7)#8        | 3.227(8)  | O(6)#5-Rb(2)-O(7)#7 | 67.0(2)    |
| P(1)-O(5)           | 1.487(11) | O(6)-Rb(2)-O(7)#7   | 106.3(2)   |
| P(1)-O(2)           | 1.498(10) | O(5)-Rb(2)-O(7)#7   | 85.9(2)    |
| P(1)-O(7)           | 1.574(7)  | O(3)-Rb(2)-O(7)#7   | 121.6(2)   |
| P(1)-O(7)#5         | 1.574(7)  | O(3)#5-Rb(2)-O(7)#7 | 79.4(2)    |
| P(2)-O(6)           | 1.485(8)  | O(6)#5-Rb(2)-O(7)#8 | 106.3(2)   |
| P(2)-O(3)           | 1.519(9)  | O(6)-Rb(2)-O(7)#8   | 67.0(2)    |
| P(2)-O(4)           | 1.540(9)  | O(5)-Rb(2)-O(7)#8   | 85.9(2)    |
| P(2)-O(1)           | 1.555(8)  | O(3)-Rb(2)-O(7)#8   | 79.4(2)    |
| Al(1)-O(3)          | 1.710(9)  | O(3)#5-Rb(2)-O(7)#8 | 121.6(2)   |
| Al(1)-O(4)#9        | 1.715(9)  | O(7)#7-Rb(2)-O(7)#8 | 44.5(3)    |
| Al(1)-O(7)          | 1.722(8)  | O(6)#5-Rb(2)-O(7)#5 | 94.55(18)  |
| Al(1)-O(1)#10       | 1.734(8)  | O(6)-Rb(2)-O(7)#5   | 133.5(2)   |
| O(2)-Rb(1)-O(6)#1   | 110.5(3)  | O(5)-Rb(2)-O(7)#5   | 44.0(2)    |
| O(2)-Rb(1)-O(6)#2   | 73.9(2)   | O(3)-Rb(2)-O(7)#5   | 89.26(19)  |
| O(6)#1-Rb(1)-O(6)#2 | 147.4(3)  | O(3)#5-Rb(2)-O(7)#5 | 49.0(2)    |
| O(2)-Rb(1)-O(1)#3   | 169.1(2)  | O(7)#7-Rb(2)-O(7)#5 | 112.03(18) |
| O(6)#1-Rb(1)-O(1)#3 | 73.8(2)   | O(7)#8-Rb(2)-O(7)#5 | 129.48(17) |
| O(6)#2-Rb(1)-O(1)#3 | 108.1(2)  | O(6)#5-Rb(2)-O(7)   | 133.5(2)   |
| O(2)-Rb(1)-O(4)#3   | 140.4(2)  | O(6)-Rb(2)-O(7)     | 94.55(18)  |
| O(6)#1-Rb(1)-O(4)#3 | 86.9(2)   | O(5)-Rb(2)-O(7)     | 44.0(2)    |
| O(6)#2-Rb(1)-O(4)#3 | 73.2(2)   | O(3)-Rb(2)-O(7)     | 49.0(2)    |
| O(1)#3-Rb(1)-O(4)#3 | 48.0(2)   | O(3)#5-Rb(2)-O(7)   | 89.26(19)  |
| O(2)-Rb(1)-O(5)#4   | 91.2(2)   | O(7)#7-Rb(2)-O(7)   | 129.48(17) |
| O(6)#1-Rb(1)-O(5)#4 | 114.7(3)  | O(7)#8-Rb(2)-O(7)   | 112.03(18) |
| O(6)#2-Rb(1)-O(5)#4 | 97.1(3)   | O(7)#5-Rb(2)-O(7)   | 40.2(2)    |
| O(1)#3-Rb(1)-O(5)#4 | 78.0(2)   | O(5)-P(1)-O(2)      | 114.3(7)   |

|                     |            |                      |          |
|---------------------|------------|----------------------|----------|
| O(4)#3-Rb(1)-O(5)#4 | 114.1(2)   | O(5)-P(1)-O(7)       | 110.9(4) |
| O(2)-Rb(1)-O(2)#4   | 96.01(8)   | O(2)-P(1)-O(7)       | 109.0(4) |
| O(6)#1-Rb(1)-O(2)#4 | 69.7(2)    | O(5)-P(1)-O(7)#5     | 110.9(4) |
| O(6)#2-Rb(1)-O(2)#4 | 142.9(2)   | O(2)-P(1)-O(7)#5     | 109.0(4) |
| O(1)#3-Rb(1)-O(2)#4 | 75.9(2)    | O(7)-P(1)-O(7)#5     | 102.0(6) |
| O(4)#3-Rb(1)-O(2)#4 | 123.5(2)   | O(6)-P(2)-O(3)       | 110.9(5) |
| O(5)#4-Rb(1)-O(2)#4 | 46.6(3)    | O(6)-P(2)-O(4)       | 112.6(5) |
| O(2)-Rb(1)-O(7)#5   | 47.7(2)    | O(3)-P(2)-O(4)       | 106.0(5) |
| O(6)#1-Rb(1)-O(7)#5 | 67.4(2)    | O(6)-P(2)-O(1)       | 113.6(5) |
| O(6)#2-Rb(1)-O(7)#5 | 99.4(2)    | O(3)-P(2)-O(1)       | 109.1(4) |
| O(1)#3-Rb(1)-O(7)#5 | 139.90(19) | O(4)-P(2)-O(1)       | 104.2(4) |
| O(4)#3-Rb(1)-O(7)#5 | 118.4(2)   | O(3)-Al(1)-O(4)#9    | 108.0(5) |
| O(5)#4-Rb(1)-O(7)#5 | 127.5(2)   | O(3)-Al(1)-O(7)      | 110.0(4) |
| O(2)#4-Rb(1)-O(7)#5 | 99.2(2)    | O(4)#9-Al(1)-O(7)    | 111.0(4) |
| O(2)-Rb(1)-O(1)#6   | 72.8(2)    | O(3)-Al(1)-O(1)#10   | 113.9(5) |
| O(6)#1-Rb(1)-O(1)#6 | 83.23(18)  | O(4)#9-Al(1)-O(1)#10 | 107.2(4) |
| O(6)#2-Rb(1)-O(1)#6 | 66.9(2)    | O(7)-Al(1)-O(1)#10   | 106.8(4) |

- #1  $-x+1, -y+1, z+1/2$     #2  $-x+1, y+1, z$   
 #3  $x-1/2, -y+3/2, z+1/2$     #4  $-x+1, -y+2, z+1/2$   
 #5  $-x+1, y, z$     #6  $x-1/2, y+1/2, z$     #7  $-x+1, -y+1, z-1/2$   
 #8  $x, -y+1, z-1/2$     #9  $x, -y+1, z+1/2$     #10  $-x+3/2, y+1/2, z$   
 #11  $x, -y+2, z-1/2$     #12  $-x+1, -y+2, z-1/2$   
 #13  $x+1/2, -y+3/2, z-1/2$     #14  $-x+1, y-1, z$   
 #15  $x+1/2, y-1/2, z$     #16  $-x+3/2, y-1/2, z$

**Table S3b.** Selected bond distances (Å) and angles (deg) for K<sub>3</sub>Al<sub>2</sub>(PO<sub>4</sub>)<sub>3</sub>.

|                  |           |                    |            |
|------------------|-----------|--------------------|------------|
| K(1)-O(7)        | 2.660(5)  | O(10)-K(2)-O(5)#2  | 144.77(17) |
| K(1)-O(9)#1      | 2.741(5)  | O(10)-K(2)-O(7)#6  | 82.72(17)  |
| K(1)-O(5)#2      | 2.811(5)  | O(5)#2-K(2)-O(7)#6 | 111.59(15) |
| K(1)-O(6)#3      | 2.955(5)  | O(10)-K(2)-O(3)#5  | 88.43(17)  |
| K(1)-O(10)#3     | 2.985(6)  | O(5)#2-K(2)-O(3)#5 | 86.06(14)  |
| K(1)-O(12)#4     | 3.015(5)  | O(7)#6-K(2)-O(3)#5 | 159.57(14) |
| K(1)-O(2)#5      | 3.093(5)  | O(10)-K(2)-O(9)    | 87.69(16)  |
| K(1)-O(6)#4      | 3.204(5)  | O(5)#2-K(2)-O(9)   | 126.17(17) |
| K(2)-O(10)       | 2.669(6)  | O(7)#6-K(2)-O(9)   | 77.07(14)  |
| K(2)-O(5)#2      | 2.721(5)  | O(3)#5-K(2)-O(9)   | 84.23(14)  |
| K(2)-O(7)#6      | 2.847(5)  | O(10)-K(2)-O(7)    | 132.73(16) |
| K(2)-O(3)#5      | 2.858(5)  | O(5)#2-K(2)-O(7)   | 76.69(14)  |
| K(2)-O(9)        | 2.935(6)  | O(7)#6-K(2)-O(7)   | 104.15(8)  |
| K(2)-O(7)        | 2.978(6)  | O(3)#5-K(2)-O(7)   | 68.91(14)  |
| K(2)-O(8)#6      | 2.988(5)  | O(9)-K(2)-O(7)     | 50.49(14)  |
| K(2)-O(1)#5      | 3.298(5)  | O(10)-K(2)-O(8)#6  | 99.35(16)  |
| K(3)-O(9)        | 2.641(6)  | O(5)#2-K(2)-O(8)#6 | 70.68(14)  |
| K(3)-O(10)       | 2.734(6)  | O(7)#6-K(2)-O(8)#6 | 50.55(12)  |
| K(3)-O(5)#7      | 2.737(5)  | O(3)#5-K(2)-O(8)#6 | 149.69(13) |
| K(3)-O(4)#7      | 2.777(5)  | O(9)-K(2)-O(8)#6   | 125.06(14) |
| K(3)-O(11)       | 3.215(6)  | O(7)-K(2)-O(8)#6   | 121.36(14) |
| P(1)-O(5)        | 1.491(4)  | O(10)-K(2)-O(1)#5  | 72.89(14)  |
| P(1)-O(1)        | 1.538(5)  | O(5)#2-K(2)-O(1)#5 | 78.31(13)  |
| P(1)-O(2)        | 1.545(5)  | O(7)#6-K(2)-O(1)#5 | 144.62(15) |
| P(1)-O(3)        | 1.548(4)  | O(3)#5-K(2)-O(1)#5 | 46.30(12)  |
| P(2)-O(10)       | 1.477(5)  | O(9)-K(2)-O(1)#5   | 125.79(14) |
| P(2)-O(6)        | 1.529(6)  | O(7)-K(2)-O(1)#5   | 111.22(14) |
| P(2)-O(11)       | 1.532(5)  | O(8)#6-K(2)-O(1)#5 | 108.07(13) |
| P(2)-O(12)       | 1.535(5)  | O(9)-K(3)-O(10)    | 92.62(17)  |
| P(3)-O(7)        | 1.496(5)  | O(9)-K(3)-O(5)#7   | 93.07(16)  |
| P(3)-O(9)        | 1.498(6)  | O(10)-K(3)-O(5)#7  | 127.69(17) |
| P(3)-O(8)        | 1.558(5)  | O(9)-K(3)-O(4)#7   | 104.02(18) |
| P(3)-O(4)        | 1.576(5)  | O(10)-K(3)-O(4)#7  | 135.04(16) |
| Al(1)-O(4)       | 1.730(5)  | O(5)#7-K(3)-O(4)#7 | 93.29(14)  |
| Al(1)-O(2)       | 1.730(5)  | O(9)-K(3)-O(11)    | 110.85(15) |
| Al(1)-O(6)#3     | 1.739(6)  | O(10)-K(3)-O(11)   | 49.15(14)  |
| Al(1)-O(3)#5     | 1.743(5)  | O(5)#7-K(3)-O(11)  | 155.57(16) |
| Al(2)-O(11)      | 1.720(5)  | O(4)#7-K(3)-O(11)  | 85.92(13)  |
| Al(2)-O(8)#7     | 1.725(5)  | O(5)-P(1)-O(1)     | 114.3(3)   |
| Al(2)-O(1)       | 1.738(5)  | O(5)-P(1)-O(2)     | 111.2(3)   |
| Al(2)-O(12)#8    | 1.747(5)  | O(1)-P(1)-O(2)     | 106.6(3)   |
| O(7)-K(1)-O(9)#1 | 83.68(16) | O(5)-P(1)-O(3)     | 112.7(3)   |

|                      |            |                      |          |
|----------------------|------------|----------------------|----------|
| O(7)-K(1)-O(5)#2     | 80.62(16)  | O(1)-P(1)-O(3)       | 105.3(3) |
| O(9)#1-K(1)-O(5)#2   | 89.35(15)  | O(2)-P(1)-O(3)       | 106.1(3) |
| O(7)-K(1)-O(6)#3     | 79.03(15)  | O(10)-P(2)-O(6)      | 110.9(3) |
| O(9)#1-K(1)-O(6)#3   | 140.67(16) | O(10)-P(2)-O(11)     | 113.2(3) |
| O(5)#2-K(1)-O(6)#3   | 121.74(15) | O(6)-P(2)-O(11)      | 105.9(3) |
| O(7)-K(1)-O(10)#3    | 94.57(16)  | O(10)-P(2)-O(12)     | 112.5(3) |
| O(9)#1-K(1)-O(10)#3  | 97.99(16)  | O(6)-P(2)-O(12)      | 106.2(3) |
| O(5)#2-K(1)-O(10)#3  | 170.77(15) | O(11)-P(2)-O(12)     | 107.6(3) |
| O(6)#3-K(1)-O(10)#3  | 49.24(14)  | O(7)-P(3)-O(9)       | 114.8(4) |
| O(7)-K(1)-O(12)#4    | 160.98(16) | O(7)-P(3)-O(8)       | 109.5(3) |
| O(9)#1-K(1)-O(12)#4  | 79.12(15)  | O(9)-P(3)-O(8)       | 110.1(3) |
| O(5)#2-K(1)-O(12)#4  | 107.08(15) | O(7)-P(3)-O(4)       | 109.4(3) |
| O(6)#3-K(1)-O(12)#4  | 109.62(15) | O(9)-P(3)-O(4)       | 109.3(3) |
| O(10)#3-K(1)-O(12)#4 | 79.94(15)  | O(8)-P(3)-O(4)       | 103.0(3) |
| O(7)-K(1)-O(2)#5     | 104.76(15) | O(4)-Al(1)-O(2)      | 108.8(2) |
| O(9)#1-K(1)-O(2)#5   | 153.17(15) | O(4)-Al(1)-O(6)#3    | 117.4(3) |
| O(5)#2-K(1)-O(2)#5   | 67.57(13)  | O(2)-Al(1)-O(6)#3    | 104.9(3) |
| O(6)#3-K(1)-O(2)#5   | 66.07(13)  | O(4)-Al(1)-O(3)#5    | 109.9(2) |
| O(10)#3-K(1)-O(2)#5  | 106.48(14) | O(2)-Al(1)-O(3)#5    | 112.6(2) |
| O(12)#4-K(1)-O(2)#5  | 94.27(14)  | O(6)#3-Al(1)-O(3)#5  | 103.1(3) |
| O(7)-K(1)-O(6)#4     | 150.67(17) | O(11)-Al(2)-O(8)#7   | 110.6(3) |
| O(9)#1-K(1)-O(6)#4   | 110.27(15) | O(11)-Al(2)-O(1)     | 106.8(2) |
| O(5)#2-K(1)-O(6)#4   | 74.11(13)  | O(8)#7-Al(2)-O(1)    | 108.4(3) |
| O(6)#3-K(1)-O(6)#4   | 101.75(9)  | O(11)-Al(2)-O(12)#8  | 113.6(3) |
| O(10)#3-K(1)-O(6)#4  | 108.20(15) | O(8)#7-Al(2)-O(12)#8 | 106.7(3) |
| O(12)#4-K(1)-O(6)#4  | 46.26(14)  | O(1)-Al(2)-O(12)#8   | 110.6(3) |
| O(2)#5-K(1)-O(6)#4   | 51.76(12)  |                      |          |

#1  $-x, -y+1, z-1/2$     #2  $x-1, y, z$     #3  $x, y, z-1$   
 #4  $x-1/2, -y+3/2, z-1$     #5  $x-1/2, -y+3/2, z$   
 #6  $-x, -y+1, z+1/2$     #7  $-x+1, -y+1, z+1/2$   
 #8  $x+1/2, -y+3/2, z$     #9  $-x+1, -y+1, z-1/2$   
 #10  $x+1, y, z$     #11  $x, y, z+1$     #12  $x+1/2, -y+3/2, z+1$



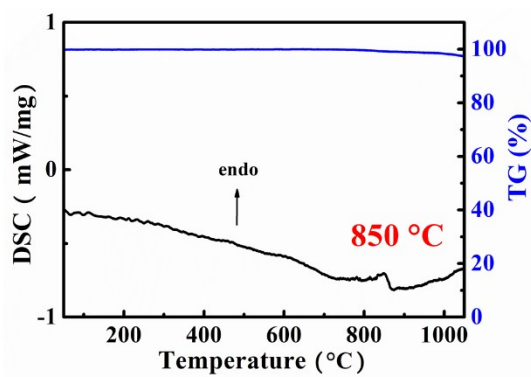

(a)

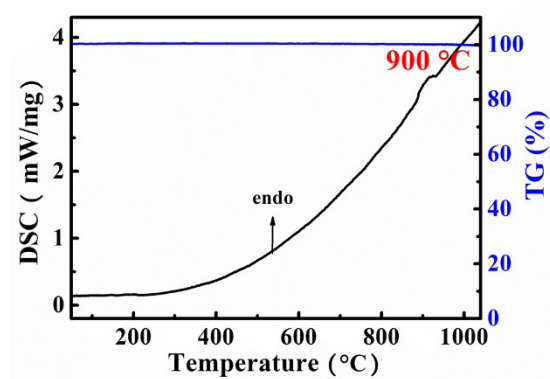

(b)

**Fig. S1.** TG-DSC curves of (a)  $\text{Rb}_3\text{Al}_2(\text{PO}_4)_3$  and (b)  $\text{K}_3\text{Al}_2(\text{PO}_4)_3$ .

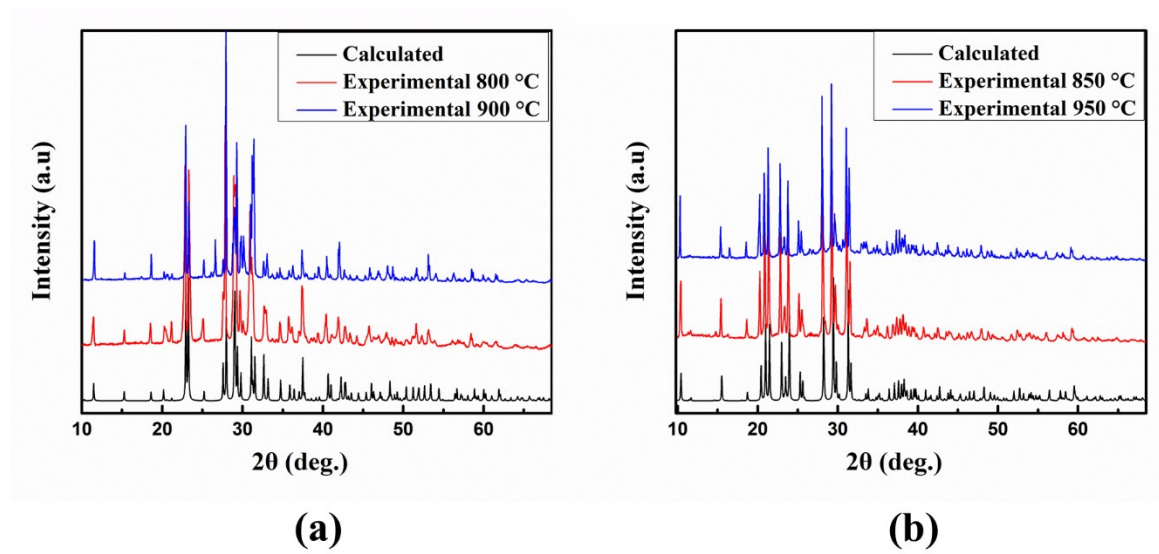

**Fig. S2.** Experimental and calculated XRD patterns of (a)  $\text{Rb}_3\text{Al}_2(\text{PO}_4)_3$  and (b)  $\text{K}_3\text{Al}_2(\text{PO}_4)_3$ .

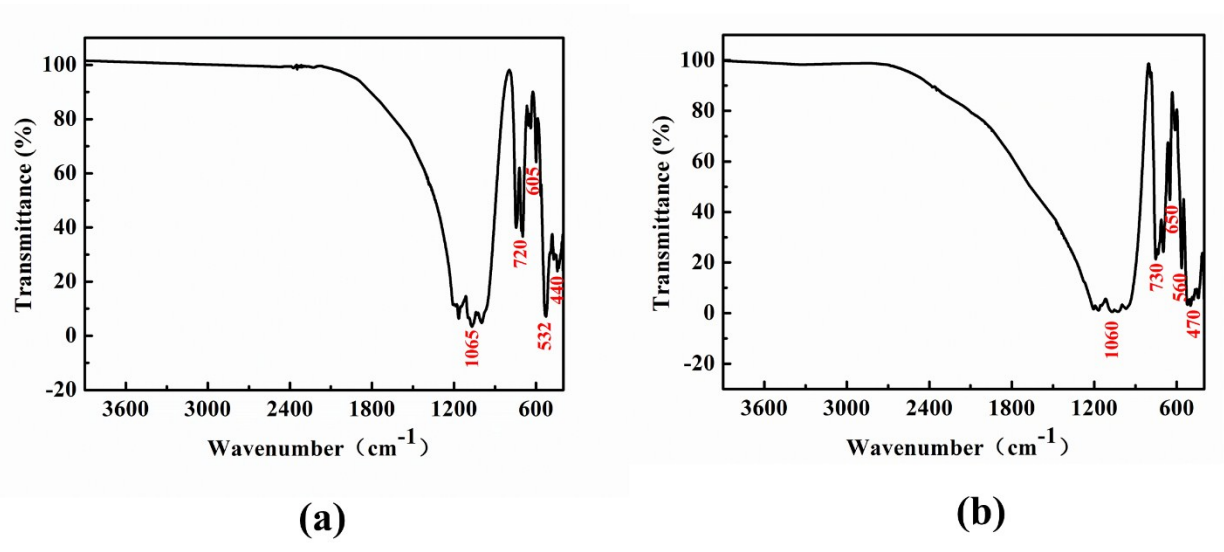

Fig. S3. IR spectra of (a) Rb<sub>3</sub>Al<sub>2</sub>(PO<sub>4</sub>)<sub>3</sub> and (b) K<sub>3</sub>Al<sub>2</sub>(PO<sub>4</sub>)<sub>3</sub>.

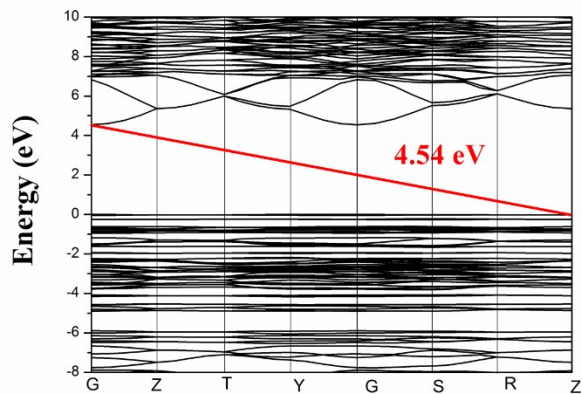

(a)

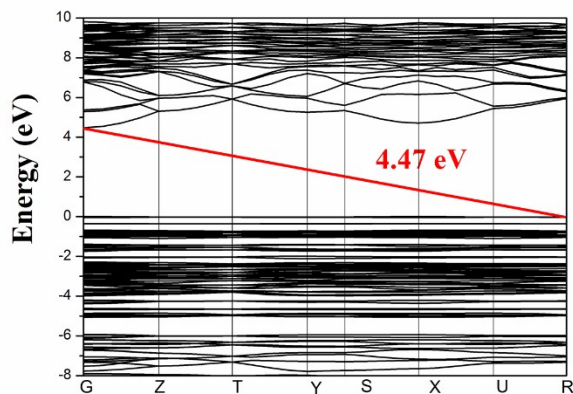

(b)

**Fig. S4.** Band structures of (a)  $\text{Rb}_3\text{Al}_2(\text{PO}_4)_3$  and (b)  $\text{K}_3\text{Al}_2(\text{PO}_4)_3$ .

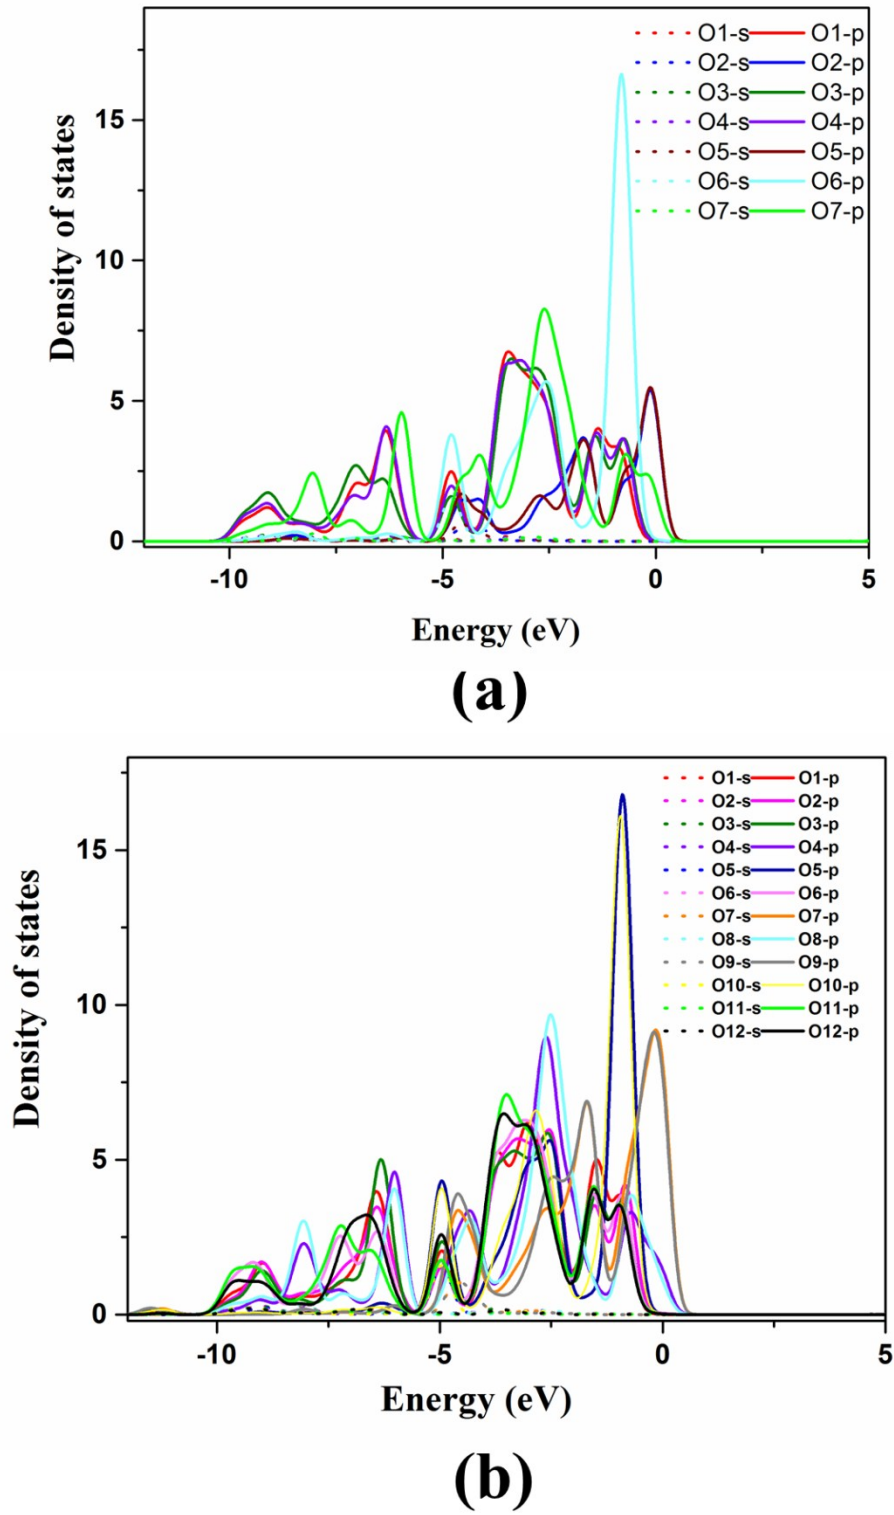

**Fig. S5.** The detailed PDOSs of the O atoms in (a)  $\text{Rb}_3\text{Al}_2(\text{PO}_4)_3$  and (b)  $\text{K}_3\text{Al}_2(\text{PO}_4)_3$ .

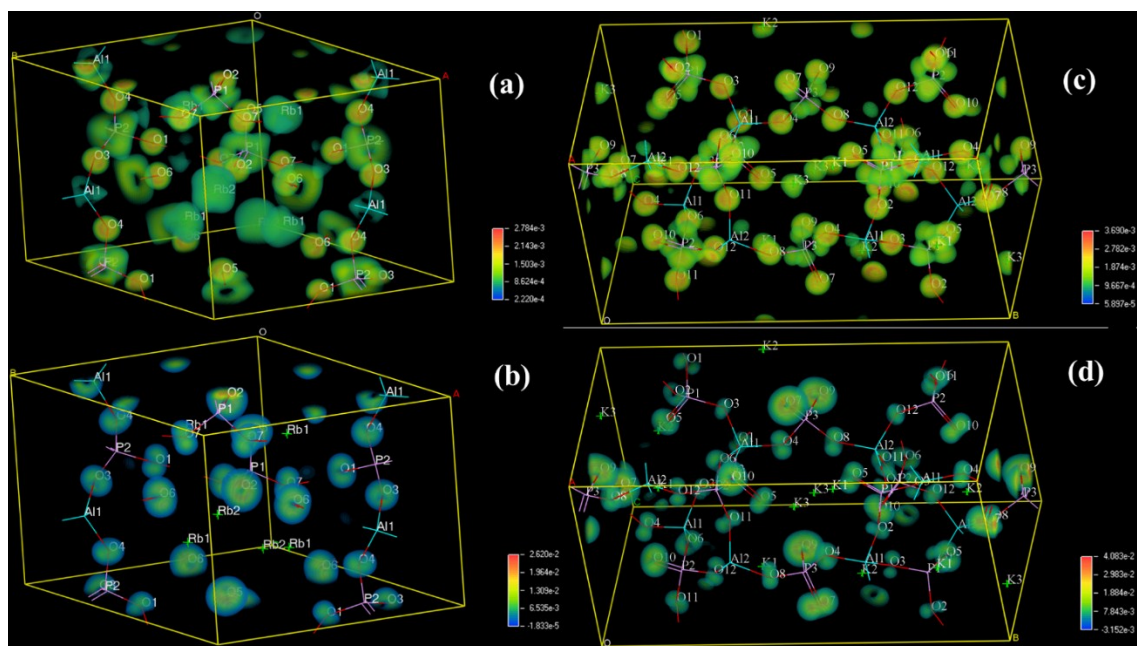

**Fig. S6.** SHG density of VE processes of (a) unoccupied states and (b) occupied states for  $\text{Rb}_3\text{Al}_2(\text{PO}_4)_3$ ; (c) unoccupied states and (d) occupied states for  $\text{K}_3\text{Al}_2(\text{PO}_4)_3$ .
